1 **Genome structure and evolution of *Antirrhinum majus* L.**

2

3 Miaomiao Li<sup>1,7\*</sup>, Dongfen Zhang<sup>1\*</sup>, Hui Zhang<sup>1,7\*</sup>, Qiang Gao<sup>3\*</sup>, Bin Ma<sup>3\*</sup>, Chunhai  
4 Chen<sup>2\*</sup>, Yingfeng Luo<sup>6</sup>, Yinghao Cao<sup>3</sup>, Qun Li<sup>1</sup>, Yu'e Zhang<sup>1</sup>, Han Guo<sup>1,7</sup>, Junhui  
5 Li<sup>1,7</sup>, Yanzhai Song<sup>1,7</sup>, Yue Zhang<sup>1,7</sup>, Lucy Copsey<sup>4</sup>, Annabel Whibley<sup>4</sup>, Yan Li<sup>3</sup>,  
6 Ming qi<sup>3</sup>, Jiawei Wang<sup>5</sup>, Yan Chen<sup>2</sup>, Dan Wang<sup>2</sup>, Jinyang Zhao<sup>2</sup>, Guocheng Liu<sup>2</sup>, Bin  
7 Wu<sup>2</sup>, Lili Yu<sup>2</sup>, Chunyan Xu<sup>2</sup>, Jiang Li<sup>2</sup>, Shancen Zhao<sup>2</sup>, Yijing Zhang<sup>5</sup>, Songnian Hu<sup>6</sup>,  
8 Chengzhi Liang<sup>a,3</sup>, Ye Yin<sup>a,2</sup>, Enrico Coen<sup>a,4</sup>, Yongbiao Xue<sup>a,1,6,7</sup>

9 <sup>1</sup>State Key Laboratory of Plant Cell and Chromosome Engineering and National  
10 Center of Plant Gene Research, Institute of Genetics and Developmental Biology,  
11 Chinese Academy of Sciences, Beijing 100101, China

12 <sup>2</sup>BGI-Shenzhen, Main Building, Beishan Industrial Zone, Yantian District, Shenzhen,  
13 518083, China

14 <sup>3</sup>State Key Laboratory of Plant Genomics, Institute of Genetics and Developmental  
15 Biology, Chinese Academy of Sciences, Beijing 100101, China

16 <sup>4</sup>John Innes Centre, Norwich, NR4 7UH, United Kingdom

17 <sup>5</sup>National Laboratory of Plant Molecular Genetics, CAS Center for Excellence in  
18 Molecular Plant Sciences, Institute of Plant Physiology and Ecology, Shanghai  
19 Institutes for Biological Sciences, Chinese Academy of Sciences, 300 Fenglin Road,  
20 Shanghai 200032, China

21 <sup>6</sup>Beijing Institute of Genomics, Chinese Academy of Sciences, Beijing 100101, China

22 <sup>7</sup>University of Chinese Academy of Sciences, Beijing 100190, China

23 \*These authors contributed equally to this work.

24 <sup>a</sup>Correspondence authors:

25 Yongbiao Xue

26 Institute of Genetics and Developmental Biology, Chinese Academy of Sciences, 1

27 West Beichen Road, Chaoyang District, Beijing 100101, China

28 Tel: 86-10-64801181

29 Fax: 86-10-64801292

30 E-mail: ybxue@genetics.ac.cn

31 Enrico Coen

32 John Innes Centre, Norwich, NR4 7UH, United Kingdom

33 Email: enrico.coen@jic.ac.uk

34 Ye Yin

35 BGI-Shenzhen, Main Building, Beishan Industrial Zone, Yantian District, Shenzhen,

36 518083, China

37 Email: yinye@genomics.cn

38 Chengzhi Liang

39 Institute of Genetics and Developmental Biology, Chinese Academy of Sciences, 1

40 West Beichen Road, Chaoyang District, Beijing 100101, China

41 Email: cliang@genetics.ac.cn

42

43 **Abstract**

44 Snapdragon (*Antirrhinum majus* L.), a member of Plantaginaceae, is an important  
45 model for plant genetics and molecular studies on plant growth and development,  
46 transposon biology and self-incompatibility. Here we report a high-quality genome  
47 assembly of *A. majus* cultivated JI7 (*A. majus* cv. JI7) of a 510 Mb with 37,714  
48 annotated protein-coding genes. The scaffolds covering 97.12% of the assembled  
49 genome were anchored on 8 chromosomes. Comparative and evolutionary analyses  
50 revealed that Plantaginaceae and Solanaceae diverged from their most recent ancestor  
51 around 62 million years ago (MYA). We also revealed the genetic architectures  
52 associated with complex traits such as flower asymmetry and self-incompatibility

53 including a unique TCP duplication around 46-49 MYA and a near complete  $\psi S$ -locus  
54 of ca.2 Mb. The genome sequence obtained in this study not only provides the first  
55 genome sequenced from Plantaginaceae but also bring the popular plant model system  
56 of *Antirrhinum* into a genomic age.

57

## 58 **Introduction**

59 The genus *Antirrhinum* belongs to the Plantaginaceae family and includes about 20  
60 species with the chromosome number of  $2n=16^1$ . The cultivated *A. majus* was  
61 domesticated as an ornamental in garden over two thousand years ago. *Antirrhinum*  
62 originated in Europe and are mainly distributed in Europe, Asia, and Africa around  
63 the Mediterranean coast. Different species in *Antirrhinum* have obvious  
64 differentiation in flower color, fragrance, flower pattern and flowering time; and  
65 interspecific hybridization often occurred among them. The genus has evolved two  
66 major mating systems, insect pollination (entomophily) and self-incompatibility (SI),  
67 to promote out-cross<sup>1,2,3</sup>.

68 *Antirrhinum* has served as an excellent system in molecular genetics and  
69 developmental biology studies in the past three decades because of its active  
70 transposable elements for generating rich mutant resources<sup>4</sup>. Several key genes were  
71 first cloned in *Antirrhinum* including the founding members of MADS (*DEFICIENS*)  
72 and TCP (*CYCLOIDEA*) gene families, a MYB gene *MIXTA* controlling petal  
73 epidermis formation, three MYB transcription factors encoded by *ROSEAL*,  
74 *ROSEAL2* and *VENOSA* controlling flower color intensity and the *SLFs* (*S-Locus*  
75 *F-box*) controlling self-incompatibility<sup>5-13</sup>. Most of these genes were identified by a  
76 representative “cut and paste” transposon-tagging systems in *Antirrhinum* involved in  
77 flower development, floral-organ identity and inflorescence architecture<sup>1,14</sup>.

78           However, it remains unclear what constitutes their genomic architectures and  
79           how they evolve without the genome structure of the regions containing these genes.  
80           Here, we report a high-quality genome sequence of *A. majus* of 510 Mb assembled  
81           with 37,714 annotated protein-coding genes combining using whole-genome shotgun  
82           sequencing of Illumina short reads and single-molecule, real time (SMRT) sequencing  
83           long reads from Pacific Biosciences (PacBio) platform. Most of the assembled  
84           sequences were anchored to chromosomes to form 8 pseudomolecules using a genetic  
85           map. Furthermore, comparative genomic analysis revealed that *Antirrhinum* was  
86           derived from related families about 62 MYA and a whole genome duplication event  
87           occurred around 46-49 MYA. We also showed a near complete genomic structure of  
88           the pseudo ( $\psi$ ) *S*-locus of *A. majus* of ca. 2 Mb, which consists of 102 genes from  
89           *RAD* to *SLF37* genes<sup>15</sup>. The genome sequence provided in this study will accelerate  
90           genomic and evolutionary studies on this classical model species.

## 91   **Results**

### 92   **Genome sequencing, assembly and annotation of *A. majus***

93           We sequenced a highly inbred *Antirrhinum* line (*A. majus* cv. JI7 with eight linkage  
94           groups) using the combination Illumina short read and Pacific Biosciences (PacBio)  
95           long read sequencing technologies by the genotyping-by-sequencing (GBS) method<sup>16</sup>.  
96           The genome size was estimated to be about 520 M based on kmer distribution. We  
97           used Canu to correct and assemble PacBio reads into contigs and using SSPACE for  
98           scaffolding with Mate-paired short reads. The assembled genome size was 510 Mb  
99           with a contig and scaffold N50 sizes of 733 kb and 3,742 kb, respectively (Figure 1,  
100          Table 1, Supplementary Figure1 and Supplementary Table 1-2). To anchor  
101          *Antirrhinum* genome sequence to chromosomes, we used JoinMap 4.1 to designed  
102          marks from re-sequencing 48 recombinant inbred lines (RIL) that derived from *A.*  
103          *majus* crossed to the self-incompatible species *A. charidemi*. Eight linkage groups  
104          covered 496.9Mb, representing 97.12% of the assembled *Antirrhinum* genome. The

105 largest chromosome 2 was estimated ca. 75.4 Mb, whereas the smallest chromosome  
106 4 ca. 50.9 Mb and chromosome 8 ca. 57.0 Mb. The average ratio of physical to  
107 genetic distance was estimated to be 753.6 kb/cM. The rate of genetic and physical  
108 distance showed lower recombination rate at the pericentromeric regions of chr4, chr6,  
109 chr7 and chr8, together with the locations of their centromeres. Validations by known  
110 genetic markers and FISH (fluorescence *in situ* hybridization) showed that the linkage  
111 groups represent a high-quality physical map (Supplementary Figure 2-4 and  
112 Supplementary Table 3).

113 To validate genome quality and integrity, the completeness of the assembled  
114 euchromatic portion was examined by comparing 25,651 public ESTs of *Antirrhinum*  
115 from NCBI (<http://www.ncbi.nlm.nih.gov/nucest/?term=EST%20Antirrhinum>) and  
116 96.59% EST sequences were mapped on the assembled genome. Next, we did the  
117 alignments between three Bacterial Artificial Chromosome (BAC) sequences and the  
118 assembled *Antirrhinum* genome, indicating an average 98.3% of euchromatin  
119 coverage. We also used BUSCO analysis to compare the quality of the assembled  
120 *Antirrhinum* genome sequence to that of other published plant genomes and showed a  
121 high quality of the assembled sequence data (Supplementary Figure 5-7).

122 We predicted a total of 37,714 protein-coding genes with an average transcript  
123 length of 3,166 bp by using *Antirrhinum* EST sequences and RNA-seq data from six  
124 major tissues: leaf, root, stem, stamen, pistil and pollen (<http://bioinfo.sibs.ac.cn/Am/>,  
125 Supplementary Excel 1). Approximately 89.11% of all genes could be functionally  
126 annotated. The average gene density in *Antirrhinum* is one gene per 15.5 kb, which is  
127 about three times lower than *Arabidopsis* (one gene/4.5 kb) and slightly higher than  
128 tomato (one gene/25.7 kb). Genes are also distributed unevenly, being more abundant  
129 in the ends of chromosomal arms. We also identified 981 transfer RNA, 800  
130 microRNA, 10 ribosomal RNA and 622 small nuclear RNA families. A total of 268.3  
131 Mb (43.8%) sequences were annotated as repeats including a wealth of class I

132 (Retrotransposon: 182.8 Mb), class II (DNA transposon: 41.1 Mb) elements,  
133 accounting for 52.6% of the assembled genome (Supplementary Table 4-7).

134 To detect the intragenomic organization in *A. majus*, self-alignment analysis was  
135 employed to reveal the duplicated and triplication regions between and within  
136 chromosomes. A whole genome triplication occurred between chromosome 1, 7 and 8,  
137 between chromosome 4, 6 and 8. Paralogous relationships among eight *Antirrhinum*  
138 chromosomes revealed 45 major duplications and 2 triplications by dot plot analyses.  
139 Collectively, forty-seven major intra-syntenic blocks spanning 1,841 pairs of  
140 paralogous genes were identified on the eight chromosomes (Figure 1, Supplementary  
141 Excel 2).

142 Taken together, the *Antirrhinum* genome generated in this study represents a  
143 high-quality chromosome-scale genome map.

144

#### 145 **Comparative genomics and evolution of *A. majus***

146 To compare *Antirrhinum* genome with other plant genomes, we first examined the  
147 synteny of *Antirrhinum* chromosomes. The results showed that homologous genes in  
148 *Antirrhinum* chromosomes 1, 4, 5, 6, 7 and 8 are collinear to tomato chromosome  
149 6/7/11, 3/8, 1/4/5, 2/3, 12 and 9, respectively, indicating that these chromosomes  
150 shared similar evolutionary histories (Figure 2a). Based on the collinearity of gene  
151 pairs, we calculated the density distribution of synonymous substitution rate per gene  
152 ( $K_s$ ) between collinear paralogous genes and inferred the time of whole-genome  
153 duplication (WGD) events in *Antirrhinum*. A peak at around 0.57-0.60 showed a  
154 recent WGD in *Antirrhinum* occurred around 46-49 Mya corresponding to a  $\beta$  event<sup>17</sup>  
155 (Figure 2b). We then compared the complexity of gene families between *Antirrhinum*  
156 and other species and showed that 9,503 gene families are shared by *Antirrhinum*,  
157 *Arabidopsis*, rice, and tomato. 6,677 gene families were possibly contracted in

158 *Antirrhinum* while the other 3,778 gene families expanded including the F-box protein  
159 family being expanded significantly (Figure 2c).

160 To examine the *Antirrhinum* genome evolution, we performed all-against-all  
161 comparison analyses for the evolution of gene families and constructed a phylogenetic  
162 tree of nine angiosperm species (*A. majus*, *A. thaliana*, *A. trichopoda*, *C. papaya*, *O.*  
163 *sativa*, *P. hybrida*, *P. mume*, *S.lycopersicum*, *S. tuberosum* and *V. vitis*) based on the  
164 shared 2114 single-copy genes of *Antirrhinum*. The divergence times of *C. papaya*-*A.*  
165 *thaliana* (55.1~90.6 million years ago) and dicot-monocot (123.9~228.5 million years  
166 ago) were used for calibration derived from the published data (Figure 2d). Taken  
167 together, these results showed that *Antirrhinum* lineage was split from potato and  
168 tomato lineages around 97 MYA with its own recent WGD event occurred about  
169 46-49 MYA.

170

### 171 **Evolution of floral asymmetry and TCP family**

172 *A. majus* has served as the genetic model of floral symmetry. Recent studies have  
173 revealed the floral asymmetry in *A. majus* is largely controlled by two TCP family  
174 TFs (CYC and DICH)<sup>7,8,18</sup>. To explore their evolution, we compared the composition  
175 and number of TCP family in several sequenced angiosperms with floral symmetry  
176 information. Both eudicot and monocot share a CYC/DICH embedded CYC/TB1  
177 clade, while radial flower basal angiosperm *A. trichopoda* lacks any members of class  
178 II CYC/TB1 clade, suggesting that class I and class II CIN clade were more ancient  
179 than class II CYC/TB1 clade, and the initial role for CYC/TB1 clade was not likely  
180 involved in floral symmetry control (Figure 3 and Supplementary Excel 3).

181 We identified a total of 30 putative functional TCP family genes, including 13  
182 class I genes, 10 class II CIN clade genes and 7 class II CYC/TB1 clade genes.  
183 Syntenic block and *Ks* analyses of the orthologous gene pairs revealed that the recent  
184 whole genome duplication and tandem duplication contributed to the expansion of

185 TCP family members, especially for the *CYC/DICH* embedded *CYC/TB1* clade  
186 (Figure 3 and Supplementary Table 8). Previous studies indicated *CYC* and *DICH*  
187 have overlapping expression patterns in floral meristems in *A. majus* and the fully  
188 radial flower only appeared in *CYC/DICH* double mutants, suggesting the genetic  
189 robustness of zygomorphic flower control. To estimate the time of *CYC* and *DICH*  
190 duplication event, we performed *Ks* analysis of the syntenic block embedding  
191 *CYC/DICH* with 79 homologous gene pairs (Supplementary Table 8). Interestingly,  
192 the results indicated this syntenic block was retained from a whole genome  
193 duplication event taken place during the time span of the zygomorphic flower  
194 emergences (about 60 million years ago). Furthermore, downstream *CYC/DICH*, two  
195 genes (*DIV* and *DRIF*) in *RAD/DIV* module have homologous copies with similar *Ks*  
196 as *CYC/DICH*, while *DRIF* is located at a WGD derived syntenic block<sup>19,20,21</sup>. Those  
197 analyses showed that the master regulators of zygomorphic flower were retained from  
198 the recent whole genome duplication, revealing the evolutionary base for the  
199 zygomorphic flower maintenance in *A. majus* and perhaps other close relatives.

200 To further explore TCP family evolution among other zygomorphic flower  
201 species, we extended the syntenic block and *Ks* analyses to *M. truncatula*, belonging  
202 to legume<sup>22</sup>. The results showed that *M. truncatula* independently undergone a recent  
203 whole genome duplication event around the similar time as *A. majus* without similar  
204 duplicated *CYC/DICH* copies, suggesting that *A. majus* harbored a unique genetic  
205 mechanism for zygomorphic flower (Supplementary Figure 8). Though we could not  
206 couple the genetic events with the appearance of zygomorphic flower, our TCP family  
207 analysis on representative angiosperms indicated that the genetic origins of  
208 zygomorphic flower were ancient and occurred around the late period of Cretaceous  
209 about 60 MYA (Figure 3).

210 Previous phylogenetic analysis suggested that zygomorphic flower  
211 independently evolved from actinomorphic ancestors for more than 25 times<sup>23</sup>. Our



212 findings indicated that gene duplications are involved in a genetic robustness of  
213 zygomorphic flower evolution by maintaining copies of master regulators.

#### 214 **Structure of the $\psi$ S-locus in *A. majus* and its gene collinearity in SI species**

215 Previously, we found the *Antirrhinum* *S*-locus is located in a heterochromatin region  
216 on the short arm of chromosome 8 through cytological investigation<sup>24</sup>. To reveal a  
217 complete pseudo ( $\psi$ )*S*-locus in self-compatible *A. majus*, we scan conserved regions  
218 (FBA/FBK domain) of *SLF* gene family in the assembled *A. majus* genome, we  
219 identified the *S* genes located in the short arm of chromosome 8 and examined their  
220 expressions inside the  $\psi$ *S*-locus region. The locus consists of 37 *SLF* genes  
221 (*SLF1-SLF37*) covering 874 kb composed of three scaffolds *Sc29*, *Sc276* and *Sc184*  
222 (Figure 4a). Six pseudogenes with FBA domains were inferred to be loss-of-function  
223 in evolution. No *S*-RNase was found in and near the region, suggesting it might be  
224 lost in self-compatible *A. majus*. *RAD* gene locates in the upstream of *SLF1* gene  
225 about 1Mb, consistent with previous studies showing its linkage with the *S*-locus<sup>24</sup>;  
226 and the region contains 102 genes from *RAD* to *SLF37*. Most *SLF* genes are expressed  
227 in pollen or anther indicating they could be related to pollination and fertilization.  
228 Taken together, these results showed that we obtained a near complete  $\psi$ *S*-locus with  
229 the largest numbers of *S* genes annotated in a plant genome (Figure 4b and  
230 Supplementary Excel 4-6).

231 To explore the *S*-locus structures between SC and SI species, we compared the  
232  $\psi$ *S*-locus sequence with nine assembled TAC (Transformation-competent artificial  
233 chromosome) sequences from four *S* haplotypes of self-incompatible *A. hispanicum*  
234 and uncovered high gene collinearity between *AhSLF12* and *AhSLF13* except for  
235 *AhSLF32* located in *S*<sub>2</sub>, *S*<sub>4</sub> and *S*<sub>5</sub> haplotypes of *A. hispanicum* (Figure 4c). An  
236 intra-chromosome inversion around the *S*-locus occurred in the *S*<sub>2</sub> haplotype of  
237 *hispanicum* as described previously. However, no apparent large collinearity was  
238 found between *A. majus* and TAC sequences containing the *S*-RNase gene, supporting

239 that the region containing *S-RNase* was deleted in the  $\psi S$ -locus. We found one  
240 orthologous pseudo-gene in *A. majus*, *AmSLF18* on chromosome 8, which has a  
241 complete corresponding coding sequence region and expressed in the *S<sub>4</sub>* haplotype,  
242 suggesting a recent duplication event (Figure 4c, Supplementary Excel 7).

243 To examine the evolution of *SLF* and *S-RNase* genes, the *K<sub>a</sub>* and *K<sub>s</sub>* rate of the  
244 twelve collinear *SLF* gene pairs showed that the values of *SLFs* are lower than that of  
245 *S-RNase* in *Antirrhinum*, and the allelic *SLF* genes showed a *K<sub>a</sub>/K<sub>s</sub>*=0.41, consistent  
246 with a negative frequency-dependent selection detected previously. Only *SLF14*  
247 appears to be a positively selected gene (*K<sub>a</sub>/K<sub>s</sub>*>1) (Supplementary Excel 8). The  
248 average divergence time of these *SLF* orthologous genes was estimated to be 4  
249 million years ago consistent with the early *Antirrhinum* species divergence of less  
250 than 5.3 million years. The average divergence time of these *S-RNases* is estimated to  
251 be around 90 MYA, consistent with the species divergence between *Antirrhinum* and  
252 Solanaceae species (Supplementary Excel 9).

253 Taken together, our results showed that the *Antirrhinum S*-locus is shaped by  
254 allelic synteny, purifying selection, gene conversion, transposition and  
255 pseudogenization .

256

## 257 **Discussion**

258 In this study, we have successfully obtained a chromosome-scale fine genome of *A.*  
259 *majus*, representing the first sequenced genome in Plantaginaceae. This genome  
260 provides a useful resource for evolutionary and molecular studies on key genes  
261 controlling complex traits in the classical eudicot model species. The comparison of  
262 404 gene families' expansions and 191 contractions in *A. majus* genome with those of  
263 nine other fully sequenced diverse plant species showed several specific evolutionary  
264 paths of important gene families, such as those involved in metabolism and signaling  
265 pathways. Furthermore, the absence of a recent WGT in *Antirrhinum* genome makes it  
266 a key diploid genome that promises to provide important insights into plant genome

267 evolution. Recently, small RNAs in natural hybrid zone of *A. majus* using this  
268 genome sequence as a reference have revealed an inverted duplication acting as steep  
269 clines by nature selection in evolution of flower color pattern<sup>25</sup>.

270       Complex traits, such as zygomorphic type flower in *Antirrhinum*, often couple  
271 with different gene duplication events. The zygomorphic structure in *Antirrhinum*  
272 occurred in late period of Cretaceous, consistent with its role in facilitating  
273 insect-mediated pollination. We demonstrated that the morphology of floral organ  
274 was associated with several gene duplication events and revealed the divergence of *A.*  
275 *majus* from other angiosperms. Although *Antirrhinum* did not experience a whole  
276 genome triplication, the duplicated region containing TCP genes on chromosomes 6  
277 and 8 are closely associated with zygomorphic flower type, showing its unique  
278 evolutionary manner because no similar mechanism had been found in closely related  
279 species. For examples, one separated whole genome duplication led to partial  
280 zygomorphic type species of *Glycine*; and a MADS box family gene change resulting  
281 in symmetrical flowers in *Orchidaceae*<sup>26,27</sup>. In general, the ancient species are mostly  
282 radial symmetry and the newly derived species with symmetrical flowers. Studies on  
283 *Antirrhinum* floral mutants supported that these two copies play a role in controlling  
284 symmetrical flower, which makes the petals polar, and the flower structure tends to be  
285 upright and is beneficial to the use of light and attracting pollinators. This mechanism  
286 could be further verified by genetic analysis in a relative species.

287       SI also is a complex trait controlled by the *S*-locus<sup>2,3</sup>. The fine genomic structure  
288 of the  $\psi$ *S*-locus from *A. majus* showed that the large number of pollen *SLFs* could be  
289 a result of recombination suppression, gene duplication, purifying selection and  
290 frequency-dependent selection<sup>28</sup>. These evolutionary processes could be the intrinsic  
291 mechanisms to maintain the low allelic diversity of orthologous *SLFs* because  
292 extensive divergence would lead to self-inactivation of S-RNase resulting in loss of SI.  
293 The deletion of S-RNase in cultivated *A. majus* could be directly associated with the  
294 loss of SI, resulting in an irreversible evolutionary process, because loss of

295 self-incompatibility of SI species often results in compatible ones and SC species are  
296 difficult or almost impossible to reverse back to self-incompatible species (Doll's  
297 Law)<sup>29</sup>. The high microcollinearity of the *S*-locus between SI and SC of *Antirrhinum*  
298 indicated that the deletion of *S-RNase* in SC species was a recent event. Some  
299 mutated *SLF* genes in different haplotypes were also evolved recently. Loss of  
300 *S-RNase* at the *S*-locus would have little consequence for the pollen phenotype while  
301 duplications would lead to expression of two types of *SLFs* which could inactivate a  
302 broader range of incoming S-RNases. Further genome analysis of additional SI  
303 species of *Antirrhinum* should provide an insight into its evolutionary status.

304 Intriguingly, the physical size of the *S*-locus in *S. lycopersicum* (17 Mb,  
305 containing 17 *SLF* genes) is much larger than that in *A. majus* (2 Mb, containing 37  
306 *SLF* genes)<sup>30</sup>. This appears to indicate that increasing the gene numbers through  
307 in-locus unequal crossovers and repetitive element enrichments by a hitchhike effect  
308 could result in its large physical size and low gene density of the *S*-locus in tomato.  
309 Rich retrotransposons and unique small regulatory RNAs associated with the *S*-loci of  
310 *Solanum* and *Antirrhinum*, respectively, appear to indicate the differential epigenetic  
311 modifications could contribute to the locus density puzzle between these species.

312 In conclusion, the high-quality genome sequence obtained in this work could be  
313 used as a reference genome for Plantaginaceae and will be helpful for genetic,  
314 genomic and evolutionary studies in both *Antirrhinum* and other flowering plants.

315

316 **URLs**

317 Genome assembly data has been deposited at NCBI BioProject ID under accession  
318 codes PRJNA227267 and Biosample ID under accession codes SAMN02991092. We  
319 built the website of *Antirrhinum* genome <http://bioinfo.sibs.ac.cn/Am>.

320 **Methods**

321 Methods and any associated references are available in the online version of the  
322 paper.

323 **Acknowledgements**

324 This work was supported by the Ministry of Science and Technology of China  
325 (2013CB945102) and the National Natural Science Foundation of China (31401045  
326 and 31221063). We thank Zhixi Tian for help of CACTA transposon analyses.

327 **Author contributions**

328 Y.X., H.Z., D.Z. and M.L. designed the experiments; M.L., D.Z. and Y.X. wrote the  
329 manuscript. Q.G., B.M., C.C., Y.L., Q.L., Y.Z., H.G., J.L., Y.Z., Y.S., L.C., A.W.,  
330 Y.C., Y.L., M.Q., J.W., Y.C., D.W., J.Z., G.L., B.W., L.Y., C.X., J.L., S.Z., Y.Z.,  
331 S.H., C.L., Y.Y., E.C. and Y.X. analyzed the data and performed the experiments.

332

333 **References**

- 334 1 Schwarz-Sommer, Z., Davies, B. & Hudson, A. An everlasting pioneer: the story  
335 of *Antirrhinum* research. *Nat Rev Genet* **4**, 655-664, doi:10.1038/nrg1127 (2003).
- 336 2 Nettancourt, D. Incompatibility in angiosperms. (*Springer-Verlag Berlin*  
337 *Heidelberg New York*) (1977).
- 338 3 Franklin-Tong, V. E. Self-incompatibility in flowering plants. (*Springer*) (2008).
- 339 4 Coen, E. S., Carpenter, R. & Martin, C. Transposable elements generate novel  
340 spatial patterns of gene expression in *Antirrhinum majus*. *Cell* **47**, 285-296  
341 (1986).

- 342 5 Sommer, H., Beltrán, J.P. & Huijser, P. Deficiens, a homeotic gene involved in  
343 the control of flower morphogenesis in *Antirrhinum majus*: the protein shows  
344 homology to transcription factors. *EMBO J.* **9**, 605-13 (1990).
- 345 6 Tröbner, W., Ramirez, L. & Motte, P. *GLOBOSA*: a homeotic gene which  
346 interacts with *DEFICIENS* in the control of *Antirrhinum* floral organogenesis.  
347 *EMBO J.* **11** 4693–4704 (1992).
- 348 7 Luo, D., Carpenter, R., Vincent, C., Copsey, L. & Coen, E. Origin of floral  
349 asymmetry in *Antirrhinum*. *Nature* **383**, 794-799 (1996).
- 350 8 Luo, D., Carpenter, R., Copsey, L., Vincent, C., Clark, J., & Coen, E. Control of  
351 Organ Asymmetry in Flowers of *Antirrhinum*. *Cell* **99**, 367-376 (1999).
- 352 9 Glover, B. J., Perez-Rodrigues, M. & Martin, C. Development of several  
353 epidermal cell types can be specified by the same MYB-related plant  
354 transcription factor. *Development* **125**, 3497-3508 (1998)
- 355 10 Schwinn, K., Venail, J., Shang, Y., Mackay, S., Alm, V., Butelli, E., Oyama, R.,  
356 Bailey, P., Davies, K. & Martin, C. A small family of MYB regulatory genes  
357 controls floral pigmentation intensity and patterning in the genus *Antirrhinum*.  
358 *Plant Cell* **18**, 831–851 (2006).
- 359 11 Lai, Z. *et al.* An F-box gene linked to the self-incompatibility (S) locus of  
360 *Antirrhinum* is expressed specifically in pollen and tapetum. *Plant Mol Biol* **50**,  
361 29-42 (2002).
- 362 12 Lee, H. S., Huang, S. & Kao, T. S proteins control rejection of incompatible  
363 pollen in *Petunia inflata*. *Nature* **367**, 560-563, doi:10.1038/367560a0 (1994).
- 364 13 Qiao, H. *et al.* The F-box protein AhSLF-S2 controls the pollen function of  
365 S-RNase-based self-incompatibility. *Plant Cell* **16**, 2307-2322,  
366 doi:10.1105/tpc.104.024919 (2004).
- 367 14 Hudson, A., Critchley, J. & Erasmus, Y. The genus *Antirrhinum* (snapdragon): a  
368 flowering plant model for evolution and development. *CSH Protoc.* doi:  
369 10.1101/pdb.emo100 (2008).
- 370 15 Corley, S.B., Carpenter, R., Copsey, L. & Coen, E. Floral asymmetry involves an  
371 interplay between TCP and MYB transcription factors in *Antirrhinum*. *Proc Natl*  
372 *Acad Sci U S A.* **102**(14):5068-73 (2005).
- 373 16 Sonah, H., Bastien, M., Iquira, E., Tardivel, A., Le ´gare ´, G., Boyle, B.,  
374 Normandeau, E., Laroche, J., Larose, S., Jean, M., et al. An improved  
375 genotyping by sequencing (GBS) approach offering increased versatility and  
376 efficiency of SNP discovery and genotyping. *PLoS One* **8**: e54603 (2013).

- 377 17 Bowers, J. E., Chapman, B. A., Rong, J. & Paterson, A. H. Unravelling  
378 angiosperm genome evolution by phylogenetic analysis of chromosomal  
379 duplication events. *Nature* **422**, 433-438, doi:10.1038/nature01521 (2003).
- 380 18 Cubas P., Lauter N., Doebley J. & Coen E. The TCP domain: a motif found in  
381 proteins regulating plant growth and development. *Plant J.* **18**, 215-222 (1999).
- 382 19 Preston, J.C., Martinez, C.C.&Hileman, L.C. Gradual disintegration of the floral  
383 symmetry gene network is implicated in the evolution of a wind-pollination  
384 syndrome. *Proc Natl Acad Sci U S A.* **108** (6):2343-8 (2011)
- 385 20 Raimundo, J., Sobral, R., Bailey, P., Azevedo, H., Galego, L., Almeida, J., Coen,  
386 E.&Costa MM. A subcellular tug of war involving three MYB-like proteins  
387 underlies a molecular antagonism in *Antirrhinum* flower asymmetry. *Plant J.* **75**  
388 (4):527-38 (2013).
- 389 21 Reardon, W., Gallagher, P., Nolan, K.M., Wright, H., Cardeñosa-Rubio, M.C.,  
390 Bragalini, C., Lee, C.S., Fitzpatrick, D.A., Corcoran, K., Wolff, K., Nugent, J.M.  
391 Different outcomes for the MYB floral symmetry genes *DIVARICATA* and  
392 *RADIALIS* during the evolution of derived actinomorphy in Plantago. *New*  
393 *Phytol.* **202**(2):716-25 (2014).
- 394 22 Young, N.D. et al., The *Medicago* genome provides insight into the evolution of  
395 rhizobial symbioses. *Nature* **480** (7378):520-4 (2011).
- 396 23 Donoghue, M., Ree, R.&Baum, D. Phylogeny and the evolution of flower  
397 symmetry in the Asteridae. *Trends in Plant Science* **3**:311-317 (1998).
- 398 24 Yang, Q., Zhang, D., Li, Q., Cheng, Z. & Xue, Y. Heterochromatic and genetic  
399 features are consistent with recombination suppression of the self-incompatibility  
400 locus in *Antirrhinum*. *Plant J* **51**, 140-151 (2007).
- 401 25 Bradley<sub>2</sub> D., Xu<sub>2</sub> P., Mohorianu<sub>2</sub> II., Whibley<sub>2</sub> A., Field<sub>2</sub> D., Tavares<sub>2</sub> H.,  
402 Couchman<sub>2</sub> M., Copsey<sub>2</sub> L., Carpenter<sub>2</sub> R., Li<sub>2</sub> M., Li<sub>2</sub> Q., Xue<sub>2</sub> Y., Dalmay<sub>2</sub> T.&  
403 Coen<sub>2</sub> E. Evolution of flower color pattern through selection on regulatory small  
404 RNAs. *Science* **358** (6365):925-928 (2017).
- 405 26 Feng, X., Zhao, Z., Tian, Z., Xu, S., Luo, Y., Cai, Z., Wang, Y., Yang, J., Wang,  
406 Z., Weng, L., Chen, J., Zheng, L., Guo, X., Luo, J., Sato, S., Tabata, S., Ma, W.,  
407 Cao, X., Hu, X.&Sun C, Luo D. Control of petal shape and floral zygomorphy in  
408 *Lotus japonicus*. *Proc Natl Acad Sci U S A.* **103** (13):4970-5 (2006).
- 409 27 Zhang et.al The *Apostasia* genome and the evolution of orchids. *Nature* 2017  
410 **549**(7672):379-383 (2017).

- 411 28 Wright, S. The distribution of self-sterility alleles in populations. *Genetics* **24**,  
412 538-552 (1939).
- 413 29 Iqic, B., and Kohn, J.R. The distribution of plant mating systems: study bias  
414 against obligately outcrossing species. *Evolution* **60**, 1098-1103 (2006).
- 415 30 Li, W. & Chetelat, R. T. Unilateral incompatibility gene *ui1.1* encodes an  
416 S-locus F-box protein expressed in pollen of *Solanum* species. *Proc Natl Acad*  
417 *Sci U S A* **112**, 4417-4422 (2015).

418



419 **Figures**

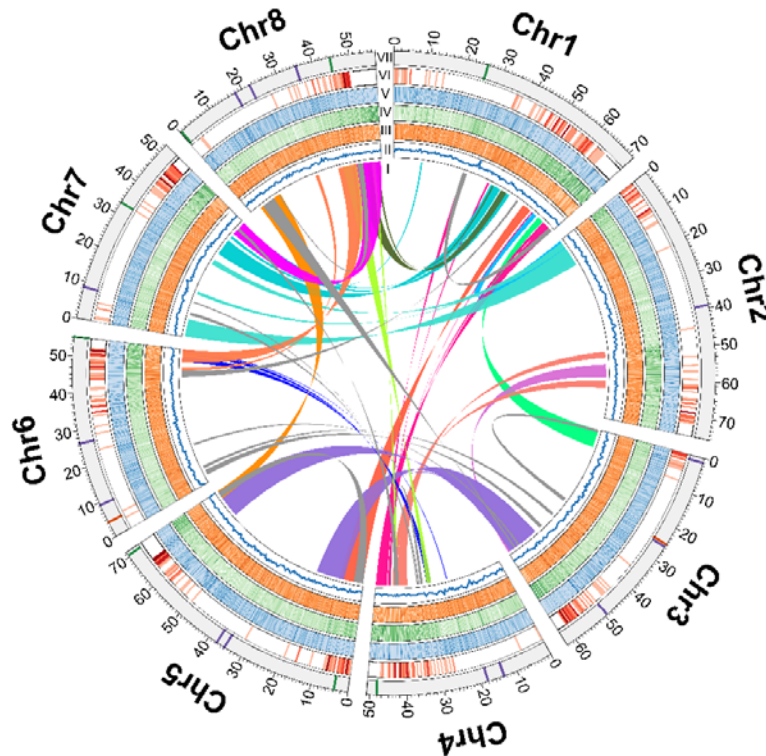

420

421 **Figure 1. Genomic structure overview of *Antirrhinum majus* JI7.**

422 (I) Duplications of genomic paralogous sequences; (II) GC content. In II, III, IV, and V,  
423 deep colors show high density genes or repeat sequence regions; (III) Simple  
424 sequence repeats; (IV) Gene density; (V) Retroelement density; (VI) Recombination  
425 rate. Deep color shows high recombination rates.; (VII) Eight *Antirrhinum*  
426 chromosomes with physical distances including low copy number repetitive elements:  
427 telomere repeat TTTAGGG (green), 5S rDNA (orange), pericentromeric repeats  
428 CentA1 and CentA2 (purple).

429

**a**

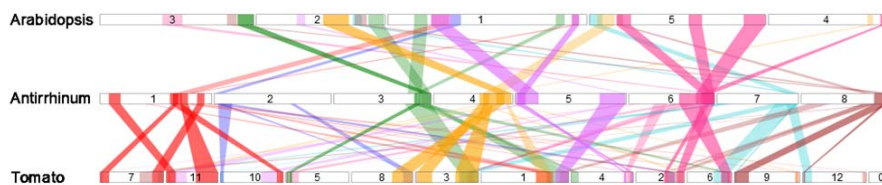

**b**

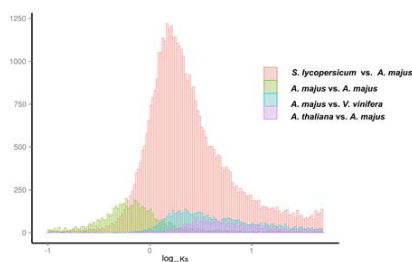

**c**

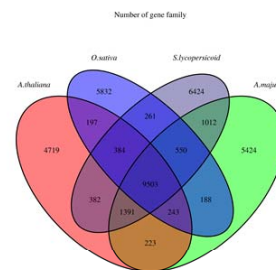

**d**

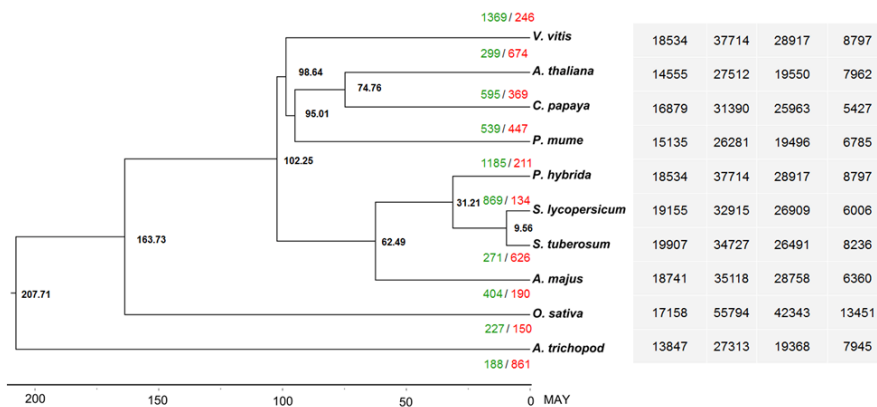

430

431 **Figure 2. Genome evolution of *A. majus*.**

432 **a** Synteny blocks among chromosomes of *A. majus*, *S. lycopersicum* and *A. thaliana*.

433 The numbers represent individual chromosomes. The selected syntenic gene number

434 more than fifty.

435 **b** Density distributions of Ks for paralogous genes.

436 **c** A Venn diagram of shared orthologues among four species. Each number represents

437 a gene family number. Venn diagram of annotated gene families showing shared

438 orthologous groups among the genomes of *A. majus*, *S. lycopersicum*, *A. thaliana*, and  
439 *O. sativa*.

440 **d** Phylogenetic tree of 10 angiosperm species including their divergence time based  
441 on orthologues of single-gene families. The number in each node indicates the  
442 number of gene families. *A. trichopoda* used as an outgroup. Bootstrap values for  
443 each node are above 100%.

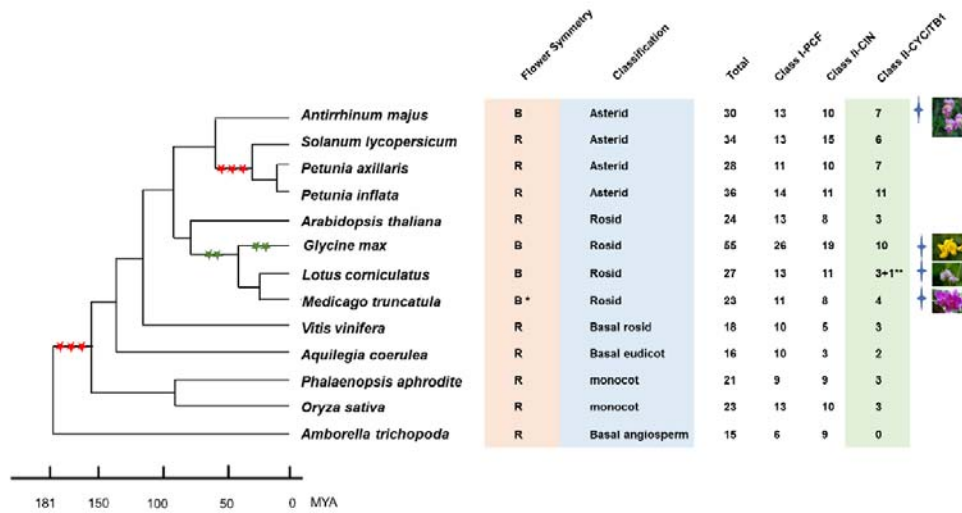

444

445 **Figure 3. Evolution of flower symmetry and TCP gene family.**

446 Left shows a phylogenetic tree of the flowering plants derived from their divergence  
 447 time based on orthologues of single-gene families. Three red stars show the whole  
 448 genome triplication and two green stars the duplication events. “B” represents  
 449 bilateral flower symmetry and “R” radial flower symmetry; Asterid, Rosid, Basal  
 450 rosid, Basal eudicot, Monocot and Basal angiosperm represent their clades,  
 451 respectively. Total numbers of TCP family genes, Class I-PCF, Class II-CIN and  
 452 Class II-CYC/TB1 are shown from left to right. \* indicates the sequenced genome of  
 453 species of *Medicago truncatula* with flower radial symmetry, but flowers of most  
 454 *Medicago* species are of bilateral symmetry. \*\* indicates *Lotus comiculatus* in which  
 455 three TCP genes were identified but a functional TCP gene was not detected in its  
 456 genome. Four-pointed stars denote bilateral symmetry flowers with their photos from  
 457 PPBC (<http://www.plantphoto.cn>).

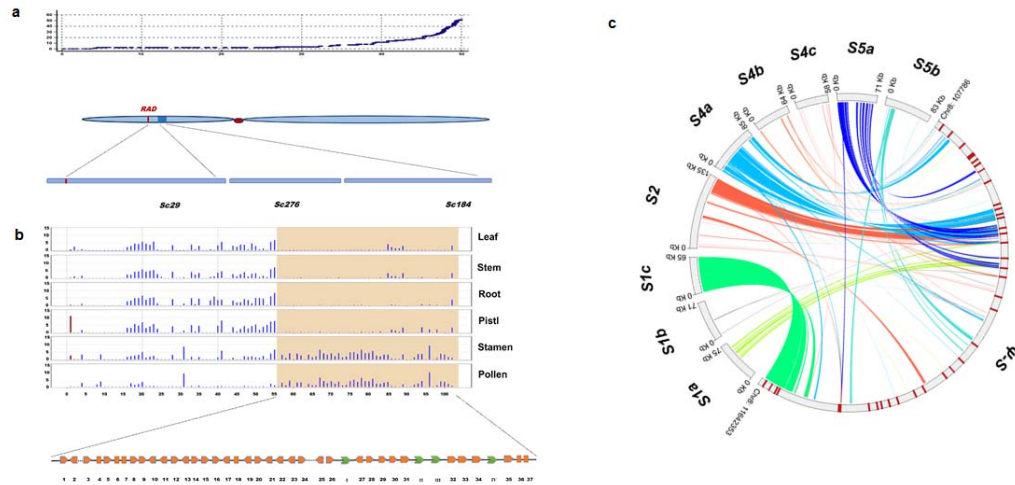

458

459 **Figure 4. Genomic features of the  $\psi S$ -locus of *A. majus* and its synteny with the**  
460 ***S*-locus regions of *A. hispanicum*.**

461 **a** Chromosomal locations of three scaffolds covering the  $\psi S$ -locus region of *A. majus*.  
462 A genetic recombination map of chromosome 8 is shown on the top panel. The x-axis  
463 shows its physical distance and the y-axis its genetic distance. A schematic  
464 representation of chromosome 8 is shown in the middle panel with a red dot  
465 indicating its centromere. The  $\psi S$ -locus is depicted as a blue box on its short arm. A  
466 vertical red line in chromosome indicates *RAD* gene. The low panel shows three  
467 scaffolds of *Sc29*, *Sc276*, and *Sc184* covering the  $\psi S$ -locus region.

468 **b** Transcriptional profiles of the  $\psi S$ -locus and its flanking regions of *A. majus*. The  
469 light yellow shadow denotes the predicted  $\psi S$ -locus region (*SLF1-SLF37*). This  
470 region between *RAD* and *SLF37* contains a total number of 102 annotated genes. The  
471 bottom part is a schematic representation of the *SLF* genes. Orange squares indicate  
472 the  $\psi SLF$  genes and green arrows the other annotated genes (I: a putative MYB  
473 family transcription factor; II and III, putative RNA-binding proteins; and IV, a  
474 putative phosphate-dependent transferase)

475    **c** The synteny of the *S*-locus regions between *A. majus* and  $S_1$ ,  $S_2$ ,  $S_4$  and  $S_5$   
476    haplotypes of *A. hispanicum*. Different colors indicate syntenic and inversion regions  
477    between the  $\psi S$ -locus and  $S_1$  ( $S_{1a}$ ,  $S_{1b}$  and  $S_{1c}$ ),  $S_2$ ,  $S_4$  ( $S_{4a}$ ,  $S_{4b}$  and  $S_{4c}$ ) or  $S_5$  ( $S_{5a}$  and  $S_{5b}$ )  
478    haplotypes of *A. hispanicum*.  
479

**Table 1 Statistics for the Antirrhinum genome and gene annotation**

|                                   |                        |
|-----------------------------------|------------------------|
| Estimate of genome size           | 520 Mb                 |
| GC content                        | 35.50%                 |
| N50 length (contig)               | 0.73 Mb                |
| Longest contig                    | 3.74 Mb                |
| Total size of assembled contigs   | 510.00 Mb              |
| N50 length (scaffold)             | 2.62 Mb                |
| Longest scaffold                  | 9.90 Mb                |
| Total size of assembled scaffolds | 511.70 Mb              |
| Number of genes                   | 37714                  |
| Average gene length               | 3166 bp                |
| Gene density                      | 73.95 Mb <sup>-1</sup> |
| Transcripts number                | 52780                  |
| Average CDS length                | 1036 bp                |
| Average protein length            | 344 aa                 |
| Average exon length               | 245 bp                 |
| Average intron length             | 314 bp                 |
| Tandem repeat                     | 13.03 Mb               |

480

## Figures

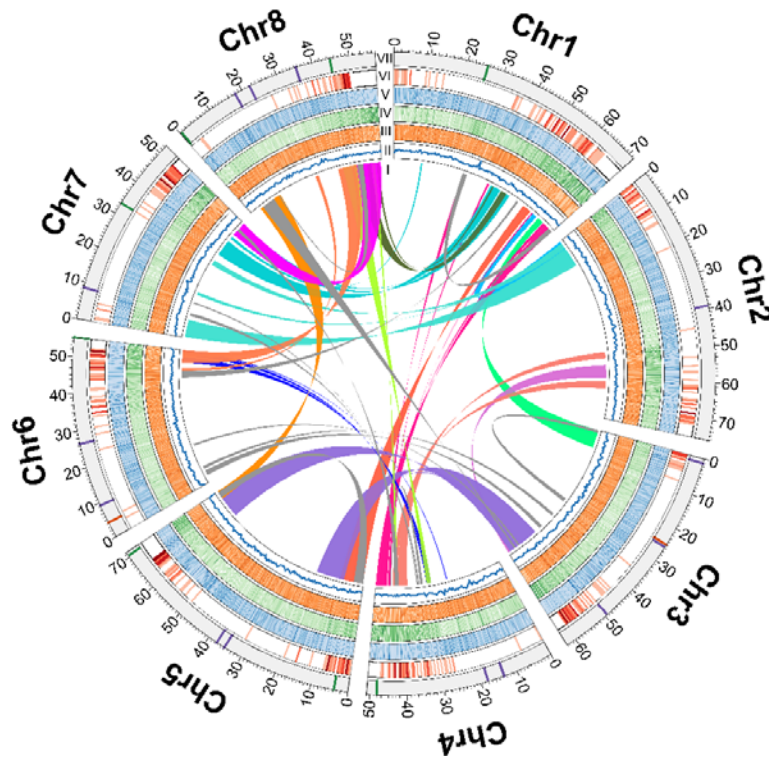

**Figure 1. Genomic structure overview of *Antirrhinum majus* JI7.**

(I) Duplications of genomic paralogous sequences; (II) GC content. In II, III, IV, and V, deep colors show high density genes or repeat sequence regions; (III) Simple sequence repeats; (IV) Gene density; (V) Retroelement density; (VI) Recombination rate. Deep color shows high recombination rates.; (VII) Eight *Antirrhinum* chromosomes with physical distances including low copy number repetitive elements: telomere repeat TTTAGGG (green), 5S rDNA (orange), pericentromeric repeats CentA1 and CentA2 (purple).



**a**

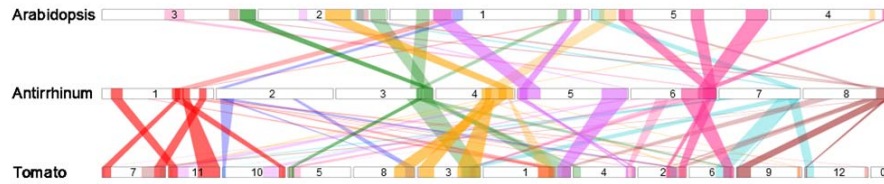

**b**

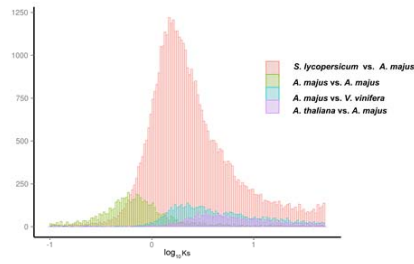

**c**

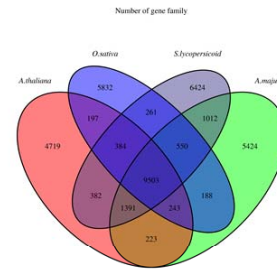

**d**

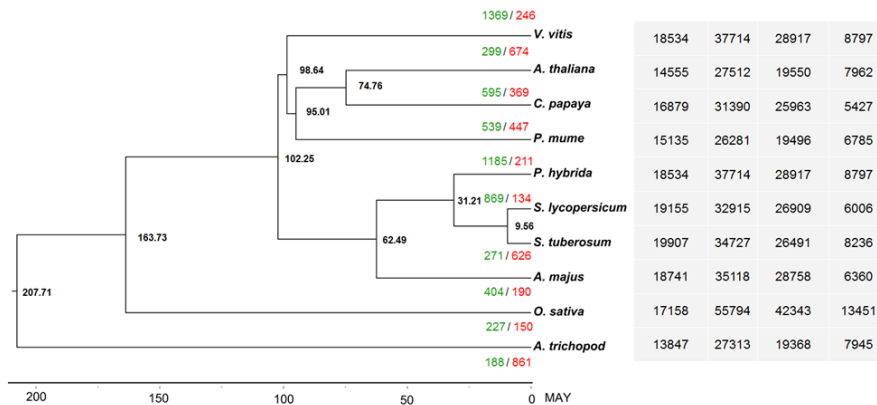

**Figure 2. Genome evolution of *A. majus*.**

**a** Synteny blocks among chromosomes of *A. majus*, *S. lycopersicum* and *A. thaliana*.

The numbers represent individual chromosomes. The selected syntenic gene number more than fifty.

**b** Density distributions of Ks for paralogous genes.

**c** A Venn diagram of shared orthologues among four species. Each number represents a gene family number. Venn diagram of annotated gene families showing shared orthologous groups among the genomes of *A. majus*, *S. lycopersicum*, *A. thaliana*, and *O. sativa*.

**d** Phylogenetic tree of 10 angiosperm species including their divergence time based

on orthologues of single-gene families. The number in each node indicates the number of gene families. *A. trichopoda* used as an outgroup. Bootstrap values for each node are above 100%.



**Figure 3. Evolution of flower symmetry and TCP gene family.**

Left shows a phylogenetic tree of the flowering plants derived from their divergence time based on orthologues of single-gene families. Three red stars show the whole genome triplication and two green stars the duplication events. “B” represents bilateral flower symmetry and “R” radial flower symmetry; Asterid, Rosid, Basal rosid, Basal eudicot, Monocot and Basal angiosperm represent their clades, respectively. Total numbers of TCP family genes, Class I-PCF, Class II-CIN and Class II-CYC/TB1 are shown from left to right. \* indicates the sequenced genome of species of *Medicago truncatula* with flower radial symmetry, but flowers of most *Medicago* species are of bilateral symmetry. \*\* indicates *Lotus comiculatus* in which three TCP genes were identified but a functional TCP gene was not detected in its genome. Four-pointed stars denote bilateral symmetry flowers with their photos from PPBC (<http://www.plantphoto.cn>).

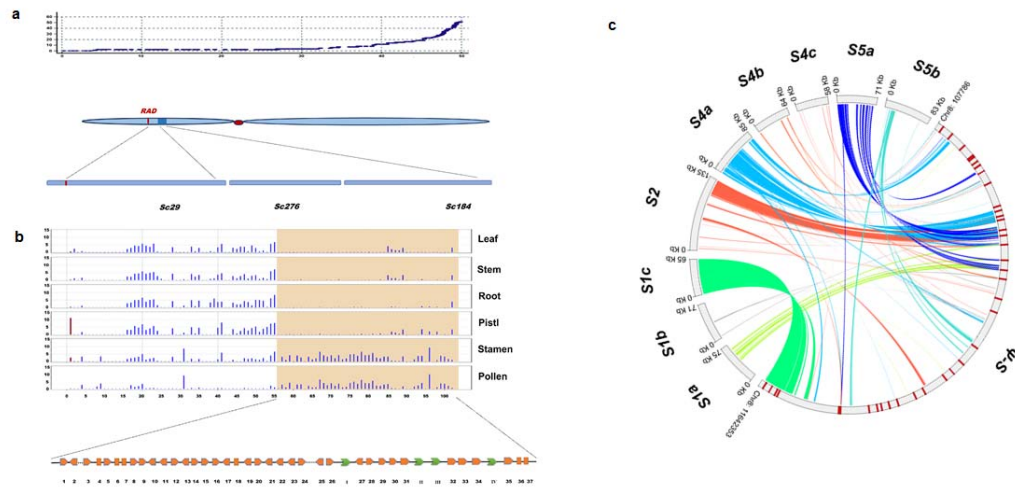

**Figure 4. Genomic features of the  $\psi S$ -locus of *A. majus* and its synteny with the *S*-locus regions of *A. hispanicum*.**

**a** Chromosomal locations of three scaffolds covering the  $\psi S$ -locus region of *A. majus*. A genetic recombination map of chromosome 8 is shown on the top panel. The x-axis shows its physical distance and the y-axis its genetic distance. A schematic representation of chromosome 8 is shown in the middle panel with a red dot indicating its centromere. The  $\psi S$ -locus is depicted as a blue box on its short arm. A vertical red line in chromosome indicates *RAD* gene. The low panel shows three scaffolds of *Sc29*, *Sc276*, and *Sc184* covering the  $\psi S$ -locus region.

**b** Transcriptional profiles of the  $\psi S$ -locus and its flanking regions of *A. majus*. The light yellow shadow denotes the predicted  $\psi S$ -locus region (*SLF1-SLF37*). This region between *RAD* and *SLF37* contains a total number of 102 annotated genes. The bottom part is a schematic representation of the *SLF* genes. Orange squares indicate the  $\psi SLF$  genes and green arrows the other annotated genes (I: a putative MYB family transcription factor; II and III, putative RNA-binding proteins; and IV, a putative phosphate-dependent transferase)

**c** The synteny of the *S*-locus regions between *A. majus* and *S*<sub>1</sub>, *S*<sub>2</sub>, *S*<sub>4</sub> and *S*<sub>5</sub> haplotypes of *A. hispanicum*. Different colors indicate syntenic and inversion regions

between the  $\psi S$ -locus and  $S_1$  ( $S_{1a}$ ,  $S_{1b}$  and  $S_{1c}$ ),  $S_2$ ,  $S_4$  ( $S_{4a}$ ,  $S_{4b}$  and  $S_{4c}$ ) or  $S_5$  ( $S_{5a}$  and  $S_{5b}$ ) haplotypes of *A. hispanicum*.
